# Supplementary material for: Bacterial topography of the respiratory tract, including pulmonary site-of-disease, in people with active tuberculosis: a case-control study
Source: Research Square preprint supplement (doi:10.21203/rs.3.rs-9956587/v1), 2026-06-09
Supplement: Supplementary file 1 [file 0ddd886ca3fdcdbab7e9a43b.docx]

**Supplementary**

**Bacterial topology of the respiratory tract, including the pulmonary site-of-disease in people with active tuberculosis: a case-control study**

Table of contents

[Methods 2](#_Toc231480750)

[Bronchoalveolar lavage 2](#_Toc231480751)

[Supplementary figures 3](#_Toc231480752)

[Figure S1.Specimens are distinct from background 3](#_Toc231480753)

[Figure S2. Upper respiratory tract (URT) versus Sputum. 4](#_Toc231480754)

[Figure S3. Comparable microbiota in cases diseased and non-diseased protected specimen brushings 5](#_Toc231480755)

[References 6](#_Toc231480756)

# Methods

## Bronchoalveolar lavage

Fitness to undergo bronchoscopy was assessed by an experienced pulmonologist following clinical examination and review of chest x-ray (CXR). Bronchoscopies with bronchoalveolar lavage (BAL) were done at Tygerberg Academic Hospital in Cape Town South Africa, based on the European Respiratory Society (ERS) and American Thoracic Society (ATS) recommendations1,2. Local anaesthetic lidocaine was used to suppress cough reflex during the procedure. Propofol and fentanyl (or Midazolam) were administered for conscious sedation during bronchoscopy. BAL with sequential aliquots of 60 mL saline was instilled and gently aspirated (after ~10s) from a sub-segmental bronchus of interest to a maximum of 150 mL per lobe. BAL was done sequentially, starting with the uninvolved lobe and then the involved lobe. After BAL, endobronchial brushings (in both lobes) with a sheathed protected specimen brush were done.

# Supplementary figures

**Figure S1. Specimens are distinct from background (BKG):** **A.** 16S rRNA sequencing read counts, **B.** α-Diversity differed across all specimen types vs. background **C.** β-Diversity differed across specimen types.

**
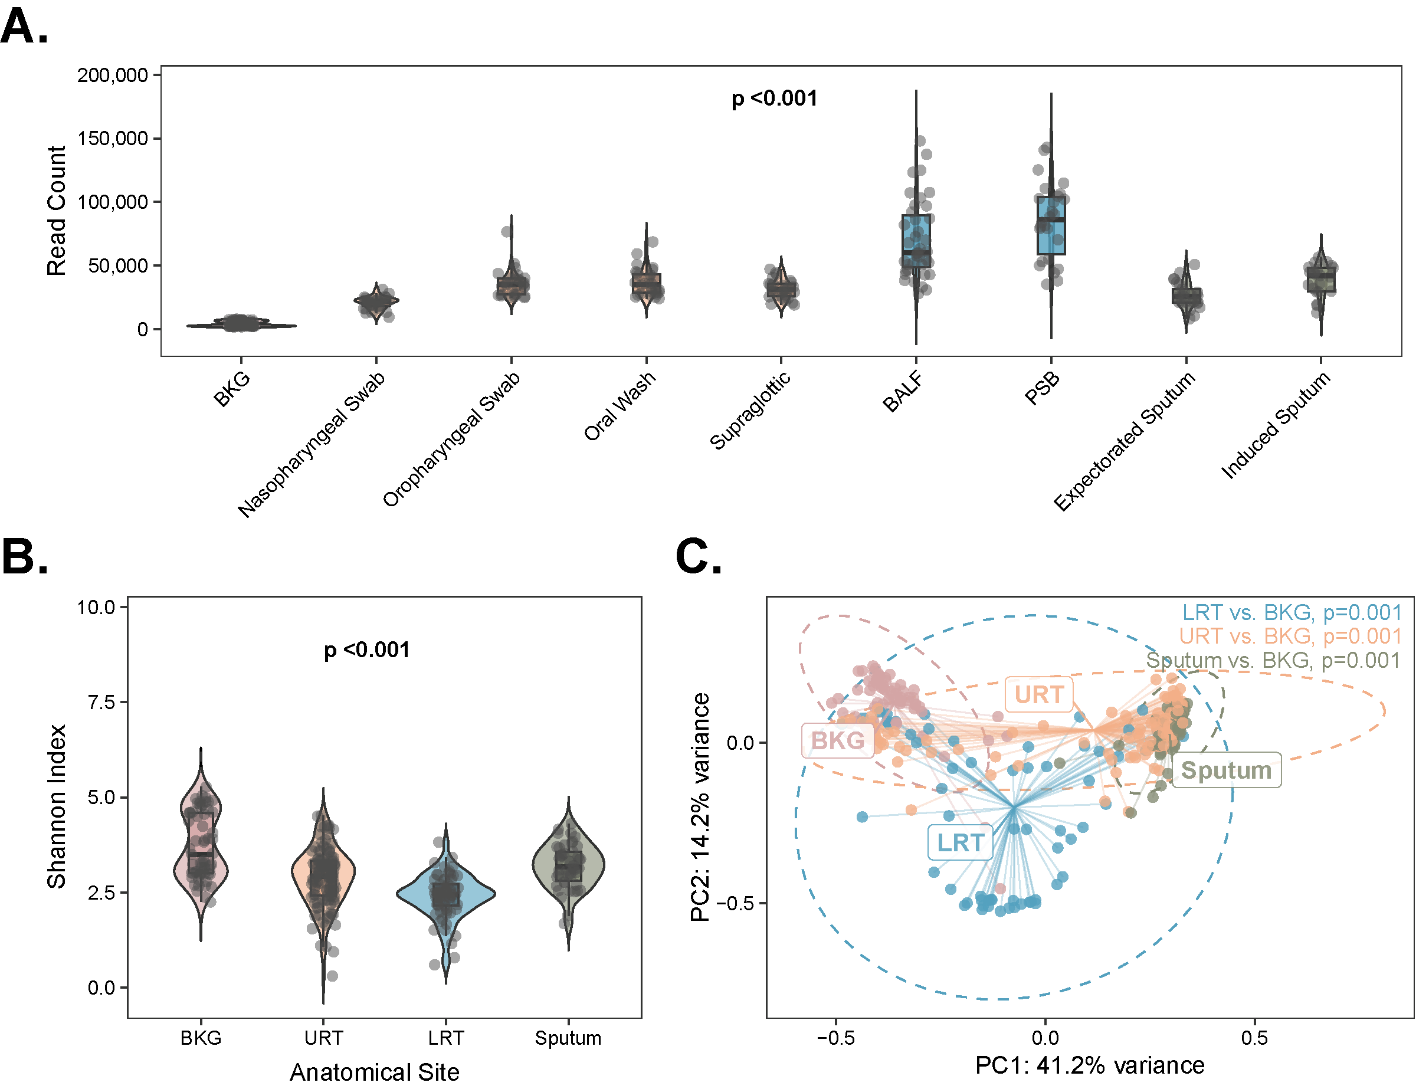
**

**Figure S2. Upper respiratory tract (URT) versus Sputum.** Bubble plots showing differentially abundant taxa in **A.** controls and **B.** cases.

**
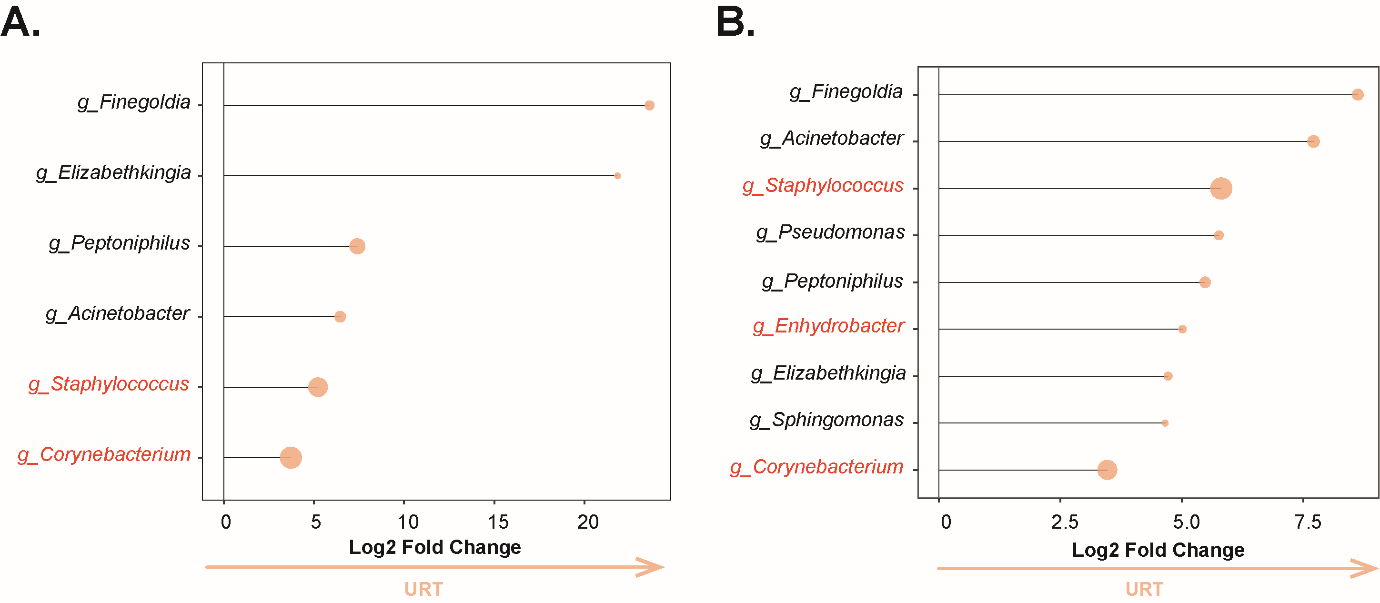
****Figure S3. Comparable microbiota in cases diseased and non-diseased protected specimen brushings (PSBs)***:* **A.** a-Diversity comparison between diseased and non-diseased lung lobes PSBs; **B.** b-Diversity comparison showing similar microbial **
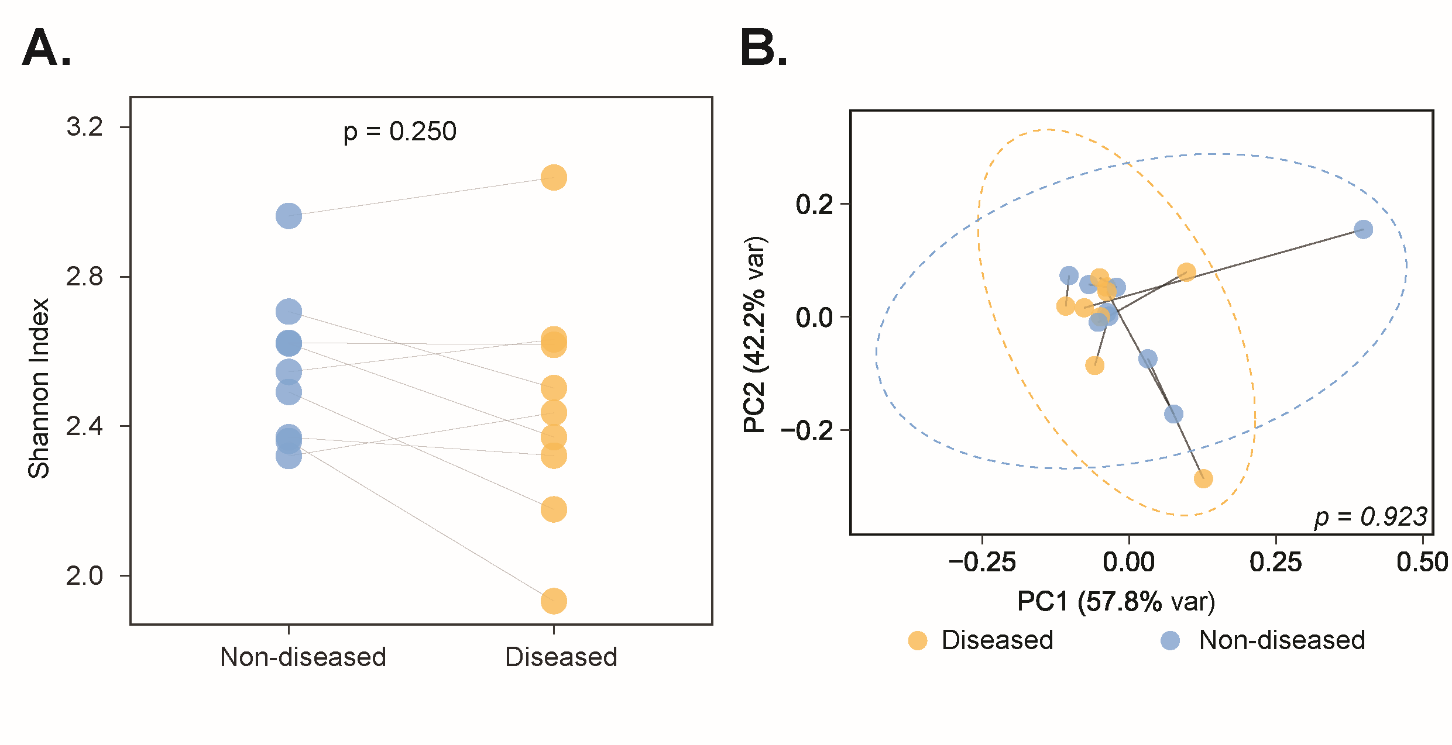
**composition in diseased and non-diseased lung lobes PSBs.

# References

1. Haslam PL, Baughman RP. Report of ERS Task Force: guidelines for measurement of acellular components and standardization of BAL. *European Respiratory Journal* 1999; **14**(2): 245-8.

2. Meyer KC, Raghu G, Baughman RP*, et al.* An official American Thoracic Society clinical practice guideline: the clinical utility of bronchoalveolar lavage cellular analysis in interstitial lung disease. *American journal of respiratory and critical care medicine* 2012; **185**(9): 1004-14.
