# Supplementary material for: Bacterial topography of the respiratory tract, including pulmonary site-of-disease, in people with active tuberculosis: a case-control study
Source: Research Square preprint supplement (doi:10.21203/rs.3.rs-9956587/v1), 2026-06-09
Supplement: Supplementary file 2 [file aa7716efd14804128ceb72a2.xlsx]

## Sheet: Table S1
Supplementary Table 1: Ranking of taxa based on relative abundance in background and whether it is a contaminant in upper respiratory tract (URT), lower respiratory tract (LRT) and sputum
Family	Genus	ASV	Rank order Background	Rank order URT	Rank order LRT	Rank order Sputum	Contaminant in URT	Contaminant in LRT	Contaminant Sputum
Staphylococcaceae	Staphylococcus	c2d41dc0a7b8eaedcf4697512aee4427	1	2	2	31	TRUE	TRUE	TRUE
Sphingomonadaceae	Novosphingobium	3ed7a33e39a7f5cb9881390cea5f53be	2	48	35	43	FALSE	FALSE	FALSE
Sphingomonadaceae	Sphingomonas	1006d42c9984f242af419f88f8f30b61	3	42	18	64	FALSE	FALSE	FALSE
Micrococcaceae	Kocuria	b4192b3f531d68bf43083142eb473463	4	8	9	7	TRUE	TRUE	TRUE
Sphingomonadaceae	Sphingomonas	0e4131e2df0be953b6ddbaa6bd96ab54	5	72	56	79	TRUE	TRUE	TRUE
Methylobacteriaceae	Methylobacterium	a55c76a00f38acb391d3ec56b134a7c4	6	79	25	45	FALSE	FALSE	FALSE
Comamonadaceae	Acidovorax	6c704f1cbd945a8ac0e38161af5f3f1e	7	135	69	86	FALSE	FALSE	FALSE
Pasteurellaceae	Gallibacterium	a8d1a7de3ae00784921379c72a06f550	8	18	1	4	TRUE	TRUE	TRUE
Hyphomicrobiaceae	Hyphomicrobium	eb7535188515af5b8d528fb0b038e9a9	9	103	74	90	FALSE	FALSE	FALSE
Microbacteriaceae	Cryocola	a19d7312c5c4cf700b176b0b1ad9b9da	10	46	29	67	FALSE	FALSE	FALSE
Verrucomicrobiaceae	Prosthecobacter	257a43e86aad9e82fc00e1445e091dbf	12	137	101	108	FALSE	FALSE	FALSE
Neisseriaceae	Neisseria	4ef3d05269c762db631f033432d48b23	13	7	7	5	TRUE	TRUE	TRUE
Campylobacteraceae	Arcobacter	aa4169aa1ef5c66597625c1a5a8ab6d5	14	88	100	107	FALSE	FALSE	FALSE
Corynebacteriaceae	Corynebacterium	c11985a6bcc2ae63e71922494f360321	15	78	42	71	FALSE	FALSE	FALSE
Streptococcaceae	Streptococcus	e0549d52e6e8e2d6d7466a515b85492d	16	154	168	168	FALSE	FALSE	FALSE
Moraxellaceae	Enhydrobacter	04a75f1199d1bc6b58d19dd8aeb24520	17	19	39	55	TRUE	TRUE	TRUE
Caulobacteraceae	Asticcacaulis	78cbe1216037089518fc724429236ac5	18	177	185	185	FALSE	FALSE	FALSE
Methanobacteriaceae	Methanobacterium	612fb1a6ef8a65e82a2ce663fb04e333	19	179	187	187	FALSE	FALSE	FALSE
Moraxellaceae	Acinetobacter	bf98d115d8cb3e8c49db5704d7a93d29	20	68	50	76	FALSE	FALSE	FALSE
Methylobacteriaceae	Methylobacterium	c05b67b25d11955d4dc0c8e06adb870c	21	94	61	58	FALSE	FALSE	FALSE
Bacillaceae	Bacillus	d0b840a248534ce65e2937e4caa2af39	22	54	33	39	FALSE	TRUE	FALSE
Rickettsiaceae	Rickettsia	9bc63fdd1a6ba8525d032714ca3a0e34	23	151	165	165	FALSE	FALSE	FALSE
Enterobacteriaceae	Erwinia	a2e521c0c4cf25a6cb3408fad8a4198b	24	36	21	65	TRUE	TRUE	TRUE
Gemmataceae	Gemmata	df222ef6a73de99d4db276fb17d6414e	25	150	164	164	FALSE	FALSE	FALSE
Corynebacteriaceae	Corynebacterium	c7fbd561062023ced0db0e8b8d9e2fb8	26	4	8	20	TRUE	TRUE	TRUE
Moraxellaceae	Acinetobacter	52e3cb0935a827c84c1e61f13bbf45d5	27	25	34	69	TRUE	TRUE	TRUE
Pasteurellaceae	Actinobacillus	5b9a6dbfc952e746732fc2d8d850487d	28	5	4	2	TRUE	TRUE	TRUE
Bdellovibrionaceae	Bdellovibrio	b353aa0fce92c5bb1586ee4b3c70509b	29	123	60	82	FALSE	FALSE	FALSE
Planococcaceae	Sporosarcina	bb0b693b66a2c2d2a81f60854963fef1	30	77	73	89	FALSE	FALSE	FALSE
Enterococcaceae	Enterococcus	627114b943a837a895c43e1f430c8d3d	31	140	97	104	FALSE	FALSE	FALSE
Microbacteriaceae	Microbacterium	b4b5167ab2caf32b198e8cf6852e5595	32	166	43	72	FALSE	FALSE	FALSE
Streptococcaceae	Streptococcus	8ff08d154f7dfc93b7ae48c3e3f85221	33	15	16	9	TRUE	TRUE	TRUE
Sphingomonadaceae	Sphingomonas	8b32a2038098185f1f959601fca7d5e6	34	183	191	191	FALSE	FALSE	FALSE
Moraxellaceae	Acinetobacter	f3b178d47f09d2c2fc4e2d211747bfe8	35	32	26	38	TRUE	TRUE	TRUE
Parachlamydiaceae	Parachlamydia	e90fed26e3e7784f61438e9499dbb206	36	184	88	99	FALSE	FALSE	FALSE
Bacillaceae	Bacillus	816b13f71e3eab6f4e0e244410a9f432	37	185	68	85	FALSE	FALSE	FALSE
Erythrobacteraceae	Erythromicrobium	a81deaf0cb3d52d04110f000b6401761	38	91	30	68	FALSE	FALSE	FALSE
Leuconostocaceae	Weissella	98cbd757ca4e20143622547345fcb59d	39	51	85	97	TRUE	TRUE	TRUE
Hyphomicrobiaceae	Pedomicrobium	cc0b3c174ba18e9862c79668e8ce9a55	40	170	179	179	FALSE	FALSE	FALSE
Veillonellaceae	Veillonella	425bce5cd053e88ab6a4db6b7758e1d3	41	9	10	6	TRUE	TRUE	TRUE
Geodermatophilaceae	Blastococcus	662b29eb9082207780e8449c2d3e2f66	42	58	83	95	TRUE	TRUE	TRUE
Mycobacteriaceae	Mycobacterium	23723b881c35962bd540251d1f575dd9	43	116	140	142	FALSE	FALSE	FALSE
Moraxellaceae	Acinetobacter	84b025324c556ea0cf4a12459af3e6a9	44	59	36	60	TRUE	TRUE	TRUE
Rhodobacteraceae	Rhodobacter	ce1aa4c83d514ebbb4e7749ad1ff4791	45	186	192	192	FALSE	FALSE	FALSE
Prevotellaceae	Prevotella	61d94d64c8bb83d0dfe931ceec445f89	46	6	6	3	TRUE	TRUE	TRUE
Mycobacteriaceae	Mycobacterium	4b92879a63fd26d78d05e2ea09fb2c6e	47	127	148	149	FALSE	FALSE	FALSE
Flavobacteriaceae	Flavobacterium	d4892a7952350a48381c503225596bbb	48	83	96	103	TRUE	FALSE	TRUE
Bifidobacteriaceae	Bifidobacterium	8d29a4b0e2aa4632d98d3b302ea9ef31	49	47	90	40	TRUE	TRUE	TRUE
Burkholderiaceae	Burkholderia	55574825bf42a32361a2fa0a6747ba42	50	153	167	167	FALSE	FALSE	FALSE
Bacillaceae	Bacillus	8adb5559e135233565acfea1287280bf	51	187	79	92	FALSE	FALSE	FALSE
Clostridiaceae	Clostridium	fb1f77e194dbd54c8cafa3e9bcdb539e	52	188	109	115	FALSE	FALSE	FALSE
Comamonadaceae	Hydrogenophaga	7b678994a743148ee705bd4404b7c247	53	189	193	193	FALSE	FALSE	FALSE
Prevotellaceae	Prevotella	edc59fc8d6e71d173af8c94394316e3b	54	12	13	11	TRUE	TRUE	TRUE
Ruminococcaceae	Ruminococcus	04452c83340ecb71a3c1bea0251bbd75	55	173	182	182	FALSE	FALSE	FALSE
[Weeksellaceae]	Elizabethkingia	872e1ad1c87973b421125a045b76ce02	56	131	55	78	FALSE	FALSE	FALSE
Enterobacteriaceae	Candidatus Blochmannia	11f41416c061d5611efb7f4355f9d7a8	57	190	194	194	FALSE	FALSE	FALSE
Campylobacteraceae	Campylobacter	bc2e91c177dcf042f2ecde858c2e64ed	58	11	12	14	TRUE	TRUE	TRUE
Sphingomonadaceae	Sphingopyxis	8292c792c3d223b0b8a4bd170c73a0c1	59	129	150	151	FALSE	FALSE	FALSE
Streptomycetaceae	Streptomyces	68c6c1f6e404dcb246b922556064f452	60	149	163	163	FALSE	FALSE	FALSE
Microbacteriaceae	Microbacterium	d714066383e7d22b0d03f9294bf2f3b9	61	145	160	160	FALSE	FALSE	FALSE
Methylobacteriaceae	Methylobacterium	21a25bfe23452644b03a2b605d600912	62	167	104	111	FALSE	FALSE	FALSE
Enterobacteriaceae	Gluconacetobacter	f309ea1ec8287026c5e76ba862929f85	63	80	119	124	FALSE	FALSE	FALSE
Bacillaceae	Oceanobacillus	9066007ea3c132b2a466c100d30d5845	64	164	176	176	FALSE	FALSE	FALSE
Sphingomonadaceae	Sphingobium	29e71bb76df8544419cb5b1b32a01a6e	65	191	195	195	FALSE	FALSE	FALSE
Sphingobacteriaceae	Pedobacter	0701780b59a0f7890ca0407a629e08ba	66	90	124	128	FALSE	FALSE	FALSE
Erythrobacteraceae	Erythrobacter	9c1b8717b31f652183474ef67647ec86	67	134	154	154	FALSE	FALSE	FALSE
Corynebacteriaceae	Corynebacterium	24b0af862d47974391cfbd4f61ad56d8	68	29	47	37	TRUE	TRUE	TRUE
Pseudonocardiaceae	Pseudonocardia	0aa6fc620e0e61ee8d035b587af8768d	69	148	102	109	FALSE	FALSE	FALSE
Moraxellaceae	Psychrobacter	671673e070cffe24831be19ba8a25933	70	71	115	121	TRUE	TRUE	TRUE
Nocardiaceae	Rhodococcus	2fc3a470029f7213361373e8b963844a	71	110	135	137	FALSE	FALSE	FALSE
Aerococcaceae	Marinilactibacillus	6a9c406bbd5f2b079cbeaafc67a2bb09	72	120	144	146	FALSE	TRUE	TRUE
Prevotellaceae	Prevotella	992bb4dd564946ed5e530eedaa1de850	73	14	15	10	TRUE	TRUE	TRUE
Rhizobiaceae	Rhizobium	01e04180e9721039f6e728f96511052d	74	192	196	196	FALSE	FALSE	FALSE
Flavobacteriaceae	Flavobacterium	a27282debd27c90a360a33cbc0591e1c	75	193	197	197	FALSE	FALSE	FALSE
Streptomycetaceae	Streptomyces	cd16b5ca1cc8072dd3ed6a43f1a36b44	76	124	145	147	FALSE	FALSE	FALSE
Paenibacillaceae	Paenibacillus	3f4e589ee2430f30046f5d506c059fa8	77	194	198	198	FALSE	FALSE	FALSE
Moraxellaceae	Moraxella	0de07f4f862b3931614c1d3023d4a474	78	3	5	16	TRUE	TRUE	TRUE
Acholeplasmataceae	Acholeplasma	3ed00904e08a78f967cf5a387c38ff70	79	195	199	199	FALSE	FALSE	FALSE
Cellulomonadaceae	Cellulomonas	073fd496d70bc29ae535185966cd0311	80	196	200	200	FALSE	FALSE	FALSE
Paenibacillaceae	Paenibacillus	def38d4f3d00feb13843036aa67fd742	81	118	142	144	FALSE	FALSE	FALSE
Myxococcaceae	Corallococcus	4cb288686955fe52f81301d76f353c2c	82	125	146	148	FALSE	FALSE	FALSE
Streptomycetaceae	Streptomyces	e6bdded7bbed59718670f28200f46f12	83	197	201	201	FALSE	FALSE	FALSE
Hyphomicrobiaceae	Hyphomicrobium	a38a372ebb437b70f7087c418cebeecc	84	198	202	202	FALSE	FALSE	FALSE
Lactobacillaceae	Lactobacillus	6658f31f4b3defccbc037636b27672e0	85	39	57	49	TRUE	TRUE	TRUE
Bartonellaceae	Bartonella	218dff545945278b7ed5dea1fc550f6d	86	199	203	203	FALSE	FALSE	FALSE
Acetobacteraceae	Roseomonas	7eed47de21804756426edc46ddbf4472	87	93	91	101	TRUE	TRUE	TRUE
Porphyromonadaceae	Porphyromonas	9e06ff8f82499e1f457e55e8a7157d0d	88	17	23	15	TRUE	TRUE	TRUE
Desulfobulbaceae	Desulfobulbus	3fcb43c73163f2418fd7ce161991382e	89	73	108	42	TRUE	TRUE	TRUE
Actinomycetaceae	Actinomyces	9c1454b23d7b9e86ad391e0b238ee420	90	13	17	12	TRUE	TRUE	TRUE
Veillonellaceae	Megamonas	203d028d72aa0a45e077a12520837b5d	91	200	204	204	FALSE	FALSE	FALSE
Caulobacteraceae	Arthrospira	d4e64fa4dcc3e096c4eb50459080ac26	92	201	205	205	FALSE	FALSE	FALSE
Spirochaetaceae	Treponema	2ad42536fe00a05b1cea41505155c624	93	20	24	19	TRUE	TRUE	TRUE
Spirochaetaceae	Treponema	d3aacc050872ebe6c5da8f8b8710ba18	94	31	65	27	TRUE	TRUE	TRUE
Bifidobacteriaceae	Bifidobacterium	07c452c872427cd35d32ed53b0147bbf	95	34	67	34	TRUE	TRUE	TRUE
Erysipelotrichaceae	[Eubacterium]	c6312d21e00e9aa6eea776a8fb2618da	96	162	174	174	FALSE	FALSE	FALSE
Prevotellaceae	Prevotella	10d2a61d5b3f7e5db7132c24b6169d2c	97	21	19	17	TRUE	TRUE	TRUE
Enterobacteriaceae	Providencia	0501edbd073aacf23be76c4894fbe74a	98	75	117	52	TRUE	TRUE	TRUE
Brucellaceae	Ochrobactrum	06e2766e32a38cde8d1e8e4b58540997	99	202	103	110	FALSE	FALSE	FALSE
Erysipelotrichaceae	Bulleidia	0b12835fa498ceaf800913bca8764435	100	40	28	30	TRUE	TRUE	TRUE
Xanthomonadaceae	Stenotrophomonas	0baefd6eb5cd4a95bdda388d545305a8	101	104	94	56	TRUE	TRUE	TRUE
Alcanivoracaceae	Alcanivorax	1413546b9e9798f33b00307c6275183f	102	95	126	130	TRUE	TRUE	TRUE
Lachnospiraceae	Moryella	14f71f6da9d62c42d0ca64f72e14117c	103	41	70	33	TRUE	TRUE	TRUE
Shewanellaceae	Shewanella	15aa70fc481647f82791cb3241c8b21e	104	52	111	117	TRUE	TRUE	TRUE
Lactobacillaceae	Lactobacillus	1834b94bb96d69405df9aa497dceab4c	105	117	141	143	TRUE	TRUE	TRUE
Clostridiaceae	Clostridium	1a0b1855c9f3ea22a57f898b23e3de48	106	76	118	123	TRUE	TRUE	TRUE
Enterobacteriaceae	Enterobacter	1bbce68e0e784a7fb95c0d452cda6b83	107	147	162	162	FALSE	FALSE	FALSE
Streptococcaceae	Streptococcus	1dd61a7d4ae7f1a1eea4c91a68f98c14	108	27	37	24	TRUE	TRUE	TRUE
Verrucomicrobiaceae	Akkermansia	226097bd7a1661a286a3b62d1c1f0e3a	109	99	107	114	TRUE	TRUE	TRUE
Clostridiaceae	Clostridium	229be85525ee50fe7388f61a158a831d	110	156	170	170	FALSE	FALSE	FALSE
Nitrososphaeraceae	Candidatus Nitrososphaera	23c96149c94681320ee881e1a6b4093b	111	180	188	188	FALSE	FALSE	FALSE
Deinococcaceae	Deinococcus	2943b4c32dc5f86d50fdeb1fa51b098a	112	96	127	131	TRUE	TRUE	TRUE
Sphingobacteriaceae	Sphingobacterium	296ccc4dec15f3589cfc657ab847bfc1	113	84	121	62	TRUE	TRUE	TRUE
Propionibacteriaceae	Propionibacterium	30afe4c85d0f76a5f95b4eef7db27af9	114	178	186	186	FALSE	FALSE	FALSE
Moraxellaceae	Psychrobacter	34b32933f7ccf504f3d591952229610c	115	35	45	73	TRUE	TRUE	TRUE
Actinomycetaceae	Actinomyces	38966dd1019d7fa2b9c85adf58d3047d	116	138	155	155	FALSE	FALSE	FALSE
Dethiosulfovibrionaceae	Pyramidobacter	3a6824cdf9c5521ea2f38bb0e742786d	117	98	129	46	TRUE	TRUE	TRUE
Mycobacteriaceae	Mycobacterium	403432032a5dcac89b8cb1610988f69e	118	56	11	50	TRUE	TRUE	TRUE
Coriobacteriaceae	Collinsella	42ba1a174207fba24df8213405dd3406	119	133	153	153	TRUE	TRUE	TRUE
Rhizobiaceae	Agrobacterium	44ab7a1bf3899fbdaaef9e48ed8e99d7	120	203	99	106	FALSE	FALSE	FALSE
Alcaligenaceae	Tetrathiobacter	44e0fd13a02209811c5b4b4217e6eed9	121	114	138	140	TRUE	TRUE	TRUE
Enterobacteriaceae	Klebsiella	45290f2590774f6d0e28f5e7a2b0c893	122	45	40	70	TRUE	TRUE	TRUE
Aerococcaceae	Alloiococcus	464e9bd2fd532feab2e14efc9506042e	123	37	66	84	TRUE	TRUE	TRUE
Flavobacteriaceae	Psychroflexus	4876b5918099d3a617db48213c8e9563	124	115	139	141	TRUE	TRUE	TRUE
Oceanospirillaceae	Marinomonas	49dbc423c4a7da144b5eeb37d9d05733	125	67	113	119	TRUE	TRUE	TRUE
Mycoplasmataceae	Mycoplasma	4a02ceae6627dd51bf7b3a847ddc112a	126	33	27	26	TRUE	FALSE	TRUE
Neisseriaceae	Conchiformibius	4d31c56867afd30b82ed50386f93b1e2	127	60	81	41	TRUE	TRUE	TRUE
Phormidiaceae	Phormidium	4f6cde0538809dd78e6e51f56009799e	128	181	189	189	FALSE	FALSE	FALSE
Micromonosporaceae	Verrucosispora	53b652fe9cf473e178fe7fb5cbd389f0	129	161	89	100	TRUE	FALSE	FALSE
Clostridiaceae	Clostridium	556ec42ed6533a8969227b56d70e9460	130	169	178	178	FALSE	FALSE	FALSE
Rhodobacteraceae	Paracoccus	568a61698895e2389cea5e409e6550bd	131	69	52	54	TRUE	TRUE	TRUE
Deinococcaceae	Deinococcus	5715c0b82c5d34874852f0d0ec093326	132	81	120	125	TRUE	TRUE	TRUE
[Paraprevotellaceae]	[Prevotella]	58c03b997c7a9aadbc28acca53358f8f	133	16	20	13	TRUE	TRUE	TRUE
Caulobacteraceae	Brevundimonas	5e25e6329241c395103a85ac3ba5e335	134	63	105	112	TRUE	TRUE	TRUE
Erysipelotrichaceae	Bulleidia	60d6f783be9a5841094d13c4a363594a	135	158	171	171	FALSE	FALSE	FALSE
Rhodobacteraceae	Paracoccus	61ed332f517752f13f15c328fee5c5d3	136	43	54	61	TRUE	TRUE	TRUE
Burkholderiaceae	Burkholderia	65a4162852e1f52a768965e3cdab28b1	137	108	134	48	TRUE	FALSE	TRUE
Corynebacteriaceae	Corynebacterium	69933e33191036943efa04a64f161d31	138	109	48	75	TRUE	TRUE	TRUE
Rhodobacteraceae	Nautella	6cc1eb0129c4e87db7c82219a394b7b2	139	122	62	83	TRUE	TRUE	TRUE
Lactobacillaceae	Lactobacillus	718b0155861cc442fc1968c068fa58d3	140	126	147	47	TRUE	TRUE	TRUE
Chitinophagaceae	Chitinophaga	73836270ff29b299ce3b74620526f84d	141	163	175	175	TRUE	FALSE	TRUE
Peptostreptococcaceae	Peptostreptococcus	74cba0ac08f0531dc1bb635ea82e69a6	142	112	136	138	TRUE	FALSE	TRUE
Pseudomonadaceae	Pseudomonas	7530566296965407330866e4a51d7fb6	143	204	92	57	FALSE	FALSE	FALSE
Vibrionaceae	Vibrio	75748e0528e4b5a106c7e6006292dbd6	144	82	87	98	TRUE	FALSE	TRUE
Campylobacteraceae	Campylobacter	77c8670a541db06cfb2e0bf0a21bcf4b	145	22	46	74	TRUE	TRUE	TRUE
Rhodospirillaceae	Azospirillum	782c1ac87dbb7cc1412805725547c467	146	119	143	145	TRUE	FALSE	FALSE
Pseudoalteromonadaceae	Pseudoalteromonas	79315e20b9464136fcb21a5293af556b	147	64	72	88	TRUE	TRUE	TRUE
Streptococcaceae	Lactococcus	7b7717e9831f8d590811dada05956310	148	141	156	156	TRUE	TRUE	TRUE
Flavobacteriaceae	Myroides	7d5c6d7b856afb14b284496a5d8452b5	149	86	123	127	TRUE	TRUE	TRUE
Paenibacillaceae	Paenibacillus	7e0040cf117b836b9ab9726149f548ac	150	132	152	152	FALSE	FALSE	FALSE
Vibrionaceae	Photobacterium	7f88fa858e3c2ef6de1a92ef36d5b587	151	97	128	132	TRUE	FALSE	TRUE
Xanthobacteraceae	Xanthobacter	8378fdbe2cee9a2485fcc48bfa6f261e	152	176	184	184	FALSE	FALSE	FALSE
Acetobacteraceae	Acetobacter	840ef3c415b2d8268893ed27ab4fcfe9	153	113	137	139	TRUE	FALSE	TRUE
Flavobacteriaceae	Capnocytophaga	84fbb00ad2224e9c158c2e1e673a6628	154	105	78	36	TRUE	TRUE	TRUE
Clostridiaceae	Thermoanaerobacterium	85344e899bbbadc3a7bad0bbef5baad8	155	139	53	77	TRUE	FALSE	TRUE
Ruminococcaceae	Oscillospira	86254a9956fcb87aead3ede5680ad82a	156	171	180	180	FALSE	FALSE	FALSE
Lactobacillaceae	Pediococcus	8637f33a9d253f414f80422e00697eaf	157	142	157	157	TRUE	FALSE	FALSE
Bacteroidaceae	Bacteroides	865f6acf3110c7d323766ed43795534a	158	85	122	126	TRUE	TRUE	TRUE
Flavobacteriaceae	Capnocytophaga	871fcc3c84b0af8daad8418bebe9534c	159	26	32	25	TRUE	TRUE	TRUE
Aerococcaceae	Alkalibacterium	8898d9383b31a93c1f1a6bcd155bb281	160	143	158	158	FALSE	FALSE	FALSE
Lactobacillaceae	Lactobacillus	89da0e390157655822b089a2d3e0104a	161	44	64	23	TRUE	TRUE	TRUE
Propionibacteriaceae	Propionibacterium	8cd1affbb991c82f03cfe7a51c8c3a57	162	175	183	183	FALSE	FALSE	FALSE
Spirochaetaceae	Treponema	95158d0cec268cf00a6eb95fb954a4df	163	30	44	28	TRUE	TRUE	TRUE
Bacillaceae	Virgibacillus	983ede3666e4f88c854aa91fb385b971	164	168	177	177	FALSE	FALSE	FALSE
Erysipelotrichaceae	Catenibacterium	9b119c3c0fa910deca32fd7571866de7	165	89	93	102	TRUE	TRUE	TRUE
Lactobacillaceae	Lactobacillus	9c8982eef9c893ee2d02cdd2f535ad46	166	92	125	129	TRUE	TRUE	TRUE
Xanthomonadaceae	Dyella	9fa7186e4b175ce36851de7110be47cb	167	152	166	166	FALSE	FALSE	FALSE
Lactobacillaceae	Lactobacillus	a53abb8ba9dcfa72af9c31a3ac4012f3	168	28	95	21	TRUE	TRUE	TRUE
Streptomycetaceae	Streptomyces	a7e89bfb9a1674d6822fe3ef6d478eaf	169	165	106	113	TRUE	FALSE	FALSE
Moraxellaceae	Psychrobacter	a9690737fad994672c9c2f9e050f3b61	170	65	112	118	TRUE	TRUE	TRUE
Flavobacteriaceae	Polaribacter	a97ea8f6bc49da39cf6def9c30984e58	171	159	172	172	FALSE	FALSE	FALSE
Bacillaceae	Bacillus	aa4fb4dd293807c66aa6b76de0ac805d	172	121	84	96	TRUE	TRUE	TRUE
Porphyromonadaceae	Dysgonomonas	ababead4ae195927b5a880d7127fafce	173	155	169	169	FALSE	FALSE	FALSE
Cellulomonadaceae	Cellulomonas	ad3013a3ebea46bc6d759a702fc3fdf8	174	106	133	136	TRUE	TRUE	TRUE
Veillonellaceae	Selenomonas	b2b0abd439948e6cf90718d5f2d44413	175	38	51	29	TRUE	TRUE	TRUE
Pasteurellaceae	Haemophilus	b8636a9850082e4f2942aa7dc9f40ad4	176	182	190	190	FALSE	FALSE	FALSE
Coriobacteriaceae	Atopobium	bba6da0e81f92e0b2af4e957cd69f42e	177	23	31	18	TRUE	TRUE	TRUE
Cardiobacteriaceae	Cardiobacterium	c1c8943f44cfa2ba3736b0e2d75f2b16	178	61	49	35	TRUE	TRUE	TRUE
Pseudomonadaceae	Pseudomonas	c2a4ff6aa7728592c0de8d95e7c94a70	179	107	98	105	TRUE	TRUE	TRUE
Lactobacillaceae	Lactobacillus	c33507209d9aff8135ca7367f77a152f	180	55	63	32	TRUE	TRUE	TRUE
Lachnospiraceae	Coprococcus	c49b96326cfed7b8d97d7ce6e9a039c7	181	146	161	161	TRUE	TRUE	TRUE
Prevotellaceae	Prevotella	c4cb15508a6be90425cb854282cdccb7	182	10	14	8	TRUE	TRUE	TRUE
Pseudonocardiaceae	Saccharopolyspora	c56a14db668130c25b2efbbe0ef26660	183	205	80	93	FALSE	FALSE	FALSE
Planococcaceae	Kurthia	c740f718c86d6e26b1435cabd580ffd7	184	50	110	116	TRUE	FALSE	TRUE
Methanobacteriaceae	Methanobrevibacter	ca9c2f216d9886e16424ee13b46d28bc	185	130	151	59	TRUE	TRUE	TRUE
Nannocystaceae	Nannocystis	cae60d3330cf5dd02a01f0ca09d2abb3	186	160	173	173	FALSE	FALSE	FALSE
Corynebacteriaceae	Corynebacterium	caeeec070ee6b349dd246a5c7da9cb98	187	102	132	135	TRUE	FALSE	FALSE
Clostridiaceae	Clostridium	ccf4ad3978d7e56b3327a881fd785d81	188	128	149	150	TRUE	TRUE	TRUE
Comamonadaceae	Comamonas	ce33e5533bba13ca75aa168e4232ef0a	189	101	131	134	TRUE	TRUE	TRUE
Deinococcaceae	Deinococcus	d0191619570be1791c522ff4a44d2b60	190	74	116	122	TRUE	TRUE	TRUE
Porphyromonadaceae	Parabacteroides	d173e3eb5ae43069f02e699f35d72238	191	100	130	133	TRUE	TRUE	TRUE
Paenibacillaceae	Paenibacillus	d7d978da6cd1c3c7b7017d6e2342a9d8	192	172	181	181	FALSE	FALSE	FALSE
Bacteroidaceae	Bacteroides	df5f8e6f57731f52381392871de418d1	193	70	114	120	TRUE	TRUE	TRUE
Desulfovibrionaceae	Desulfovibrio	e5c91c814b3c6b5eba9a4dcac3272c0b	194	144	159	159	FALSE	FALSE	FALSE
Dermabacteraceae	Brachybacterium	e8a8bc2ad86cd08de9faef9cbe03b491	195	62	59	81	TRUE	TRUE	TRUE
Bacteroidaceae	Bacteroides	ed93c7b4d801fcb9f9f0c4c32624fa8f	196	136	58	80	TRUE	FALSE	FALSE
Streptococcaceae	Streptococcus	edb746a89c7468efd070259602554105	197	49	76	53	TRUE	TRUE	TRUE
Lactobacillaceae	Lactobacillus	eec75af11130febf1a4af7b2928274fc	198	66	86	51	TRUE	TRUE	TRUE
Enterococcaceae	Vagococcus	ef2e0f6aa32b8826d130885e2305d4c1	199	157	82	94	TRUE	FALSE	FALSE
Xanthomonadaceae	Stenotrophomonas	f18bb9b9f2f5a3e2b348a036ee905d9f	200	53	77	63	TRUE	TRUE	TRUE
Enterococcaceae	Enterococcus	f6546059b4d41a74cc40f5d562259249	201	87	71	87	TRUE	TRUE	TRUE
Campylobacteraceae	Campylobacter	f68719f09bbc931d612957253434239c	202	111	41	44	TRUE	FALSE	TRUE
Peptococcaceae	Desulfosporosinus	fb42b14e9d9fc5fbfba3b5241690dc84	203	174	22	66	TRUE	FALSE	TRUE
Brevibacteriaceae	Brevibacterium	fde5540f3a06738d19a24a009ffbe803	204	57	75	91	TRUE	TRUE	TRUE
Veillonellaceae	Mitsuokella	fe726095eb6f801ec79f2fe504f9756f	205	24	38	22	TRUE	TRUE	TRUE

## Sheet: Table S2
	URT Overall (cases and controls, n=28)
Characteristic	α-diversity (p-value)	β-diversity (p-value)
TB_status	< 0.001	0.003
Sex	0.002	0.125
PTB	0.028	0.047
BMI	0.333	0.066
Smoking	0.286	0.078
Alcohol	0.489	0.063
Drugs	0.792	0.223
Sputum Overall (cases and controls, n=28)
Characteristic	α-diversity (p-value)	β-diversity (p-value)
TB_status	0.002	0.001
Sex	0.416	0.106
PTB	< 0.001	0.005
BMI	0.053	0.016
Smoking	0.685	0.017
Alcohol	0.25	0.035
Drugs	0.69	0.065
LRT Overall (cases and controls, n=28)
Characteristic	α-diversity (p-value)	β-diversity (p-value)
TB_status	0.039	0.201
Sex	0.092	0.861
PTB	0.25	0.656
BMI	0.074	0.557
Smoking	0.892	0.71
Alcohol	0.25	0.586
Drugs	0.445	0.422
